# Supplementary material
Source: Springer Nature journal article supplement (https://www.springermedizin.de/resource/supplementary/13014_2012_664_MOESM4_ESM.pdf/9633862)

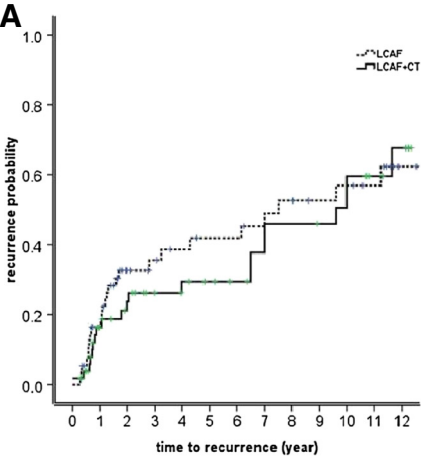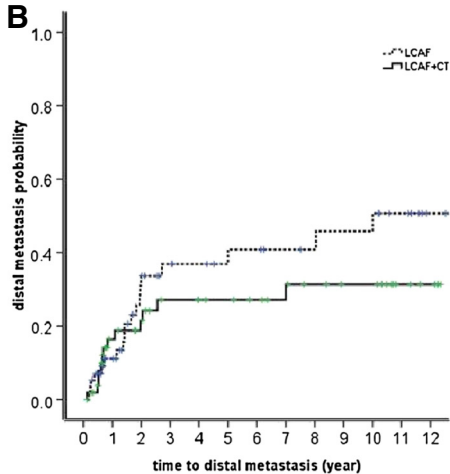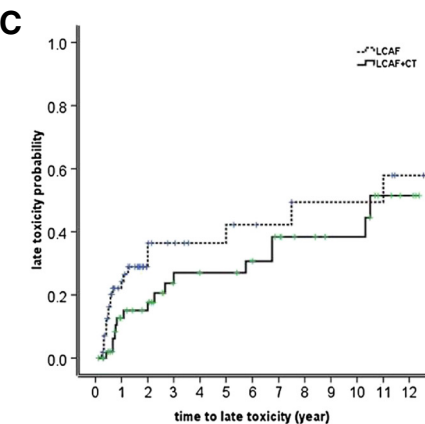

Supplement: MOESM4 [file 9633862]
